1 **Aggressiveness as a latent personality trait of domestic**

2 **dogs: testing local independence and measurement**

3 **invariance**

4 Conor Goold<sup>1\*</sup>, Ruth C. Newberry<sup>1</sup>

5 <sup>1</sup> Department of Animal and Aquacultural Sciences, Norwegian University of Life

6 Sciences, Ås, Akershus, Norway

7 \* Corresponding author: [conor.gould@nmbu.no](mailto:conor.gould@nmbu.no) (CG)

## 8 **Abstract**

9 Studies of animal personality attempt to uncover underlying or 'latent' personality traits  
10 that explain broad patterns of behaviour, often by applying latent variable statistical  
11 models (e.g. factor analysis) to multivariate data sets. Two integral, but infrequently  
12 confirmed, assumptions of popular latent variable models in animal personality are: i)  
13 behavioural variables are independent (i.e. uncorrelated) conditional on the latent  
14 personality traits they reflect (*local independence*), and ii) personality traits are  
15 associated with behavioural variables in the same way across individuals or groups of  
16 individuals (*measurement invariance*). We tested these assumptions using observations  
17 of aggression in four age classes (4 - 10 months, 10 months - 3 years, 3 - 6 years, over 6  
18 years) of male and female shelter dogs (N = 4,743) in 11 different contexts. A structural  
19 equation model supported the hypothesis of two correlated ( $\rho = 0.25$ ;  $p < 0.001$ )  
20 personality traits underlying aggression across contexts: aggressiveness towards people  
21 and aggressiveness towards dogs (comparative fit index: 0.97; Tucker-Lewis index: 0.96;  
22 root mean square error of approximation: 0.03). Aggression across contexts was  
23 moderately repeatable (towards people: ICC = 0.479, 95% CI: 0.466, 0.491; towards  
24 dogs: ICC = 0.303, 95% CI: 0.291, 0.315). However, certain contexts related to  
25 aggressiveness towards people (but not dogs) shared significant residual correlations  
26 unaccounted for by latent levels of aggressiveness. Furthermore, aggressiveness  
27 towards people and dogs in different contexts interacted with sex and age. Thus, sex  
28 and age differences in displays of aggression were not simple functions of underlying  
29 aggressiveness. Our results illustrate that the robustness of traits in latent variable

30 models must be critically assessed before making conclusions about the effects of, or  
31 factors influencing, animal personality. Our findings are of concern because inaccurate  
32 'aggressive personality' trait attributions can be costly to dogs, recipients of aggression  
33 and society in general.

34

35 *Key words:* animal personality assessment; agonistic behaviour; shelter dogs;  
36 measurement bias; behavioural phenotyping

## 37 Introduction

38 Studies of non-human animal personality, defined by relatively consistent between-  
39 individual differences in behaviour, demonstrate that organisation of the behavioural  
40 phenotype is markedly hierarchical and non-independent [1–3]. Observed patterns of  
41 behaviour can be explained by broad behavioural dimensions or personality traits,  
42 including boldness, activity, exploration, sociability and aggressiveness [4], which are  
43 further inter-correlated to form behavioural syndromes [5]. To interpret the complexity  
44 inherent in behavioural phenotypes, personality traits and behavioural syndromes are  
45 frequently inferred using latent variable statistical models, which reduce two or more  
46 measured variables (the *manifest* variables) into one or more lower-order variables (the  
47 *latent* variables). Latent variable models have been popular in human psychology for  
48 over a century [6], and now comprise a flexible set of methods to derive lower-order  
49 variables from multivariate data sets [7].

50

51 Because latent variables are unobserved, latent variable models require careful  
52 application and interpretation [8–10]. In animal personality, many studies use *formative*  
53 models, such as principal components analysis, that construct composite variables  
54 comprised of linear combinations of measured variables. However, formative models  
55 impose only weak assumptions about the relationships between latent variables and  
56 measured variables [11]. As such, their utility for inferring the nature of personality  
57 traits has been criticised in both animals [12,13] and humans [9,11,14,15]. Alternatively,

58 researchers have used *reflective* models, such as factor analysis and, increasingly,  
59 confirmatory approaches such as structural equation modelling. These models regress  
60 measured behaviours on one or more latent variables [11], incorporating measurement  
61 error and possibilities to compare *a priori* competing hypotheses (for applications in  
62 animal personality, see [1,16–18]).

63

64 Whilst reflective models offer a powerful framework to probe the latent variable  
65 structure of behaviour, they impose certain constraints on the interpretation and  
66 modelling of latent variables that have received scrutiny in human psychology but are  
67 rarely discussed in studies of animal personality. Two foundational assumptions of these  
68 models are *local independence* and *measurement invariance*. Local independence  
69 implies that manifest variables should be independent of each other conditional on the  
70 latent variables [19,20]. For example, given a latent variable  $\theta$  and two binary manifest  
71 variables  $Y_1$  and  $Y_2$  that can take the values 0 and 1, the item response theory model  
72 asserts that  $P(Y_1 = 1, Y_2 = 1 | \theta) = P(Y_1 = 1 | \theta)P(Y_2 = 1 | \theta)$ . As such, the latent  
73 variables should screen off any dependence between manifest variables. Measurement  
74 invariance, on the other hand, implies that the latent variables function the same (i.e.  
75 are invariant or equivalent) in different subsets of a population or in the same  
76 individuals through time [21–24]. That is, given a fixed level  $x$  on a latent variable  $\theta$ ,  
77 denoted  $\theta_x$ , the expected values of manifest variables  $Y_i$ , from  $i = 1$  to  $N$ , should be the  
78 same across a grouping factor  $\pi$  (e.g. sex or different populations), expressed as  
79  $E(Y_i | \theta_x) = E(Y_i | \theta_x, \pi)$ . Intuitively, violations of either local independence or

80 measurement invariance imply that the latent variables do not completely explain  
81 variation in manifest variables, which may lead to artefactual conclusions about the  
82 differences between individuals as a function of trait scores [25–27]. More generally,  
83 investigating violations of local independence and measurement invariance can identify  
84 measurement biases that can be rectified to improve the quality of personality  
85 assessments.

86

87 The use of latent variable modelling is particularly common in studies of personality in  
88 domestic dogs (*Canis lupus familiaris*), where the collection of data sets comprised of  
89 multiple behavioural variables (e.g. questionnaires) has been prevalent for decades [28–  
90 30]. Personality assessments are important both in applied settings to predict the  
91 behaviour of dogs at future time points [31] and also to elucidate behavioural traits  
92 pertinent to dogs' domestication history [32,33]. Decomposing behaviour into a smaller  
93 number of underlying dimensions that explain variation in measured behaviours aids in  
94 measuring hypothesised stable behavioural features of individuals from which  
95 predictions of future behaviour are estimable and upon which selection may have been  
96 focused. Nonetheless, research on personality in dogs has led to different numbers and  
97 composition of hypothesised personality traits with little clear consensus on how such  
98 traits should be compared within and between studies [34–36]. Most importantly, the  
99 predictive value of personality assessments in dogs has been inconsistent [31,37–41],  
100 perhaps most prominently in shelter dog personality assessments (e.g. see [31] for a  
101 review). The predictive validity of personality assessments is of particular concern in

102 tests of aggression, where aggression is frequently divided into different aggressiveness  
103 traits, including owner-, stranger-, dog- or animal-directed factors [29,35,42,43]. Based  
104 on such assessments, if falsely labelled as aggressive in one or more of these categories,  
105 the dog may be euthanised unnecessarily whereas, if falsely considered unaggressive,  
106 the dog may be more likely to be placed in situations leading to harmful behaviour. Dog  
107 bites are a serious public health concern [44], especially for animal shelters rehoming  
108 dogs to new owners, and aggressive behaviour is undesirable to many organisations  
109 using dogs for various working roles [45].

110

111 Why has the prediction of dog personality been difficult? On one hand, the validation of  
112 personality tests has been criticised for lacking rigour [34,46], meaning the targeted  
113 traits may not be under measurement as intended. In particular, commonly-used  
114 'battery assessments', comprised of different sub-tests conducted sequentially, may not  
115 be valid if the responses to one sub-test alter how the animal responds to subsequent  
116 sub-tests given an underlying trait (e.g. if test items are 'invasive' to subsequent items;  
117 [47]). Moreover, test batteries can be "inherently stress-inducing for test animals" ([31]:  
118 10), so behavioural responses may be functions of the targeted traits and stress  
119 responses. On the other hand, personality may simply not be generalisable across all  
120 individuals if individual behaviour is differentially dependent on factors such as age (e.g.  
121 [35,40]) or fluctuating environmental conditions (e.g. behaviour in a shelter versus out  
122 of a shelter; [48]). In reflective latent variable modelling, greater attention to the  
123 assumptions of local independence and measurement invariance is, thus, warranted.

124 For aggressiveness specifically, if aggression shown in one context or test item increases  
125 the likelihood of aggression in others [48], local independence would be violated.  
126 Further, interactive effects between aggressiveness and demographic variables, such as  
127 age, sex, breed or neuter status (e.g. [49–51]), would violate the assumption of  
128 measurement invariance. Whilst van den Berg *et al.* [18] reported measurement  
129 invariance of the *stranger-directed aggression* factor from the Canine Behaviour and  
130 Research Questionnaire (C-BARQ; [29]) across three breeds of dogs, measurement  
131 invariance of aggression assessed with respect to other factors has not been evaluated  
132 and, to our knowledge, no authors have confirmed local independence between  
133 manifest variables in animal personality assessments.

134

135 In this paper, we assessed local independence and measurement invariance of  
136 aggressiveness using a large sample of data on inter-context aggression in shelter dogs.  
137 First, we sought to decompose observations of aggression towards people and dogs  
138 across contexts into separate aggressiveness traits. Secondly, we assessed whether  
139 aggression in different contexts remained associated beyond that explained by latent  
140 levels of aggressiveness, testing local independence. Thirdly, we investigated whether  
141 the probability of aggression in different contexts believed to be underpinned by the  
142 same aggressiveness trait was measurement invariant with respect to sex and age  
143 groups. While it may be unrealistic for measurement invariance to hold in all instances,  
144 it is important to establish whether it holds across basic biological variables such as age



145 and sex which are generally applicable to dog populations undergoing personality  
146 assessment.

147

## 148 **Materials & Methods**

### 149 **Subjects**

150 Observational data on the occurrence of aggression in 4,743 dogs were gathered from  
151 Battersea Dogs and Cats Home's (UK) observational and longitudinal dog behaviour  
152 assessment records. The data were from a sample of dogs (N=4,990) at the shelter's  
153 three rehoming centres during 2014 (including dogs that arrived during 2013 or left in  
154 2015). We selected the records from all dogs that were at least 4 months old, excluding  
155 younger dogs because they were more likely to be unvaccinated, more limited in their  
156 interactions at the shelter and may have been kennelled in different areas to older dogs.  
157 Relevant demographic characteristics of the dogs are provided in Table 1. Although dogs  
158 were from a variety of heritages (including purebreeds and mongrels), the analyses here  
159 did not explore breed differences because visual assessment to attribute breed to dogs  
160 with unknown heritage has been questioned [52].

161

162

**Table 1. Demographic characteristics of the studied dogs.**

| <b>Variable</b>                                              | <b>Mean <math>\pm</math> SD / N</b> |
|--------------------------------------------------------------|-------------------------------------|
| Average age at shelter (years; all $\geq$ 4 months of age)   | 3.75 $\pm$ 3.03                     |
| Total days at the shelter                                    | 25.13 $\pm$ 41.53                   |
| Weight (average weight if multiple measurements; kg)         | 19.06 $\pm$ 10.26                   |
| Rehoming centre: London / Old Windsor / Brands Hatch         | 2897 / 1280 / 566                   |
| Males / females                                              | 2749 / 1994                         |
| Neutered before arrival / neutered at shelter / not neutered | 1218 / 1665 / 1502                  |
| Relinquished by owners / returned to shelter / strays        | 2892 / 260 / 1591                   |

163

## 164 **Shelter environment**

165 The shelter was composed of three different UK rehoming centres: Battersea, London  
166 (average capacity in 2014/2015: 167 dogs); Old Windsor (average capacity in  
167 2014/2015: 133 dogs); Brands Hatch (average capacity in 2014/2015: 47 dogs). All dogs  
168 arrived in an intake area of their respective rehoming centre and, when considered  
169 suitable for adoption, were moved to a 'rehoming' area that was partially open to the  
170 public between 1000 h and 1600 h. All kennels were indoors. Kennels varied in size, but  
171 were usually approximately 4m x 2m and included either a shelf and bedding alcove  
172 area, or a more secluded bedding area at the back of the kennel (see [53] for more  
173 details). At different times throughout the day, dogs had access to indoor runs behind  
174 their kennels. In each kennel block area, dogs were cared for (e.g. fed, exercised, kennel  
175 cleaned) by a relatively stable group of staff members, allowing the development of

176 familiarity with staff members and offering some predictability for dogs after arrival at  
177 the shelter. Although data on the number of dogs in each kennel were incomplete, in  
178 the majority of cases dogs were kennelled singly for safety reasons. The shelter mainly  
179 operated between 0800 h and 1700 h each day. All dogs were socialised with staff  
180 and/or volunteers each day (often multiple times) unless it was unsafe to do so. They  
181 were provided water ad libitum and fed commercial complete dry and/or wet tinned  
182 food twice daily (depending on recommendations by veterinary staff). Dogs received  
183 daily tactile, olfactory and/or auditory enrichment/variety (e.g. toys, essential oils,  
184 classical music, time in a quiet 'chill-out' room).

185

## 186 **Data collection**

187 In the observational assessment procedure, trained shelter employees recorded  
188 observations of dog behaviour in a variety of contexts as part of normal shelter  
189 procedures. The average number of days between successive observations within all  
190 contexts and across all dogs was 3.27 (SD = 2.08), and dogs had an average of 9.77 (SD =  
191 13.41) observations within each context. Behavioural observations pertaining to each  
192 context were completed using an ethogram specific to that context and recorded in a  
193 custom computer system. Multiple observations could be completed each day. The  
194 ethogram behaviour that best described a dog's behaviour in a particular context during  
195 an observation was recorded by selecting it from a series of drop-down boxes (one for  
196 each context). Although staff could also add additional information in character fields,

197 we did not analyse those comments in this study. The ethogram for each context  
198 represented a scale of behaviours ranging from desirable to undesirable considered by  
199 the shelter to be relevant to dog welfare and ease of adoption. Contexts had between  
200 10 and 16 possible behaviours to choose from, some of which overlapped between  
201 different contexts. Among the least desirable behaviours in each context was aggression  
202 towards either people or dogs (depending on context). Aggression was formally defined  
203 as “*Growls, snarls, shows teeth and/or snaps when seeing/meeting other people/dogs,*  
204 *potentially pulling or lunging towards them*”, distinguished from non-aggressive but  
205 reactive responses, defined as “*Barks, whines, howls and/or play growls when*  
206 *seeing/meeting other people/dogs, potentially pulling or lunging towards them*”.  
207 Observation contexts included both onsite (at the shelter) and offsite (e.g. out in public  
208 parks) settings.

209

210 For the analyses here, we focused on observations of aggression in nine core onsite  
211 contexts: i) *Handling*, ii) *In kennel*, iii) *Out of kennel*, iv) *Interactions with familiar people*,  
212 v) *Interactions with unfamiliar people*, vi) *Eating food*, vii) *Interactions with toys*, viii)  
213 *Interactions with female dogs*, ix) *Interactions with male dogs*. For the *In kennel* and *Out*  
214 *of kennel* contexts, recording of aggression towards both people and dogs was possible.  
215 Although multiple observations could be made, if both occurred at the same time,  
216 aggression towards people would be prioritised over aggression towards dogs in the  
217 recording process. Therefore, *In kennel* and *Out of kennel* were each divided to reflect  
218 aggression shown towards people and dogs, respectively. This resulted in 11 final

219 aggression contexts, defined in Table 2, which were used as manifest variables in  
220 structural equation models to investigate latent aggressiveness traits. Each observation  
221 of aggression was recorded in the category that best described the scenario.  
222 Nonetheless, certain contexts could occur closely in space and time. For example, the  
223 *Handling* context could directly succeed the *Interactions with familiar people* or  
224 *Interactions with unfamiliar people* contexts. The sequential occurrence of certain  
225 contexts was used to inform tests of local independence, explained below.

226

227 We aggregated behavioural observations across time for each dog into a dichotomous  
228 variable indicating whether a dog had or had not shown aggression in a particular  
229 context at any time while at the shelter. This was performed because the overall  
230 prevalence of aggression was low, with only 1.06% of all observations involving  
231 aggression towards people and 1.13% towards dogs. Thus, the main difference between  
232 individuals was whether they had or had not shown aggression in a particular context  
233 during their time at the shelter (see Table S1 for raw counts of aggression by context),  
234 and we interpret aggressiveness here as a between-individual difference variable.

**Table 2. Behavioural observation contexts.**

| <b>Context</b>                      | <b>Definition</b>                                                                                                                                                                                                                                                       |
|-------------------------------------|-------------------------------------------------------------------------------------------------------------------------------------------------------------------------------------------------------------------------------------------------------------------------|
| Handling                            | A dog's reaction to informal handling by people (e.g. stroking non-sensitive areas, touching the collar, fitting a harness or lead).                                                                                                                                    |
| In kennel towards people            | A dog's reaction to people approaching or walking past the kennel.                                                                                                                                                                                                      |
| In kennel towards dogs              | A dog's reaction to dogs in neighbouring kennels or dogs walking past the kennel.                                                                                                                                                                                       |
| Interactions with familiar people   | A dog's reaction when outside of the kennel to familiar people (interacted with at least once before) approaching, making eye contact, speaking to or attempting to make physical contact with the dog.                                                                 |
| Interactions with unfamiliar people | A dog's reaction when outside of the kennel to unfamiliar people (never interacted with before) approaching, making eye contact, speaking to or attempting to make physical contact with the dog.                                                                       |
| Out of kennel towards people        | A dog's reaction when around people outside of the kennel. Large distances may separate the focal dog and people, and no attempt is made to engage by the people with the focal dog.                                                                                    |
| Out of kennel towards dogs          | A dog's reaction when around dogs outside of the kennel. Large distances may separate the focal dog and other dogs, and the dogs are not encouraged to interact.                                                                                                        |
| Eating food                         | A dog's reaction when eating food (e.g. from a food bowl, or toy filled with food) to people approaching, in close proximity, or attempting to touch the food container.                                                                                                |
| Interactions with toys              | A dog's reaction when interacting with toys to people approaching within close proximity and/or attempting to touch the toy.                                                                                                                                            |
| Interactions with female dogs       | A dog's reaction during structured interactions with a female dog, including approaching each other, walking in parallel, and interacting off-lead. Both dogs are aware of each other's presence and are in close enough proximity to engage in a physical interaction. |
| Interactions with male dogs         | A dog's reaction during structured interactions with a male dog, including approaching each other, walking in parallel, and interacting off-lead. Both dogs are aware of each other's presence and are in close enough proximity to engage in a physical interaction.   |

Behavioural observation contexts analysed for the presence or absence of aggression.

## 235 **Validity of behaviour recordings**

236 Validity of the recording of behaviour was assessed separately from the main data  
237 collection as part of a wider project investigating the use of the observational  
238 assessment method. Ninety-three shelter employees trained in conducting behavioural  
239 observations each watched (in groups of 5 – 10 people) 14 videos, approximately 30  
240 seconds each, presenting exemplars of 2 different behaviours from seven contexts (to  
241 keep the sessions concise and maximise the number of participants). For each context,  
242 behaviours were chosen pseudo-randomly by numbering each behaviour and selecting  
243 two numbers using a random number generator. Experienced behaviourists working at  
244 the shelter filmed the videos demonstrating the behaviours. Videos were shown to  
245 participants once in a pseudo-random order. After each video, participants recorded on  
246 a paper answer sheet the behaviour they thought most accurately described the dog's  
247 behaviour based on the ethogram specific to the context depicted. Two of the videos  
248 illustrated aggression: one in a combined *Interactions with new and familiar people*  
249 context (combined because familiarity between specific people and dogs was not  
250 universally known) and one in the *In kennel towards dogs* context. The authors were  
251 blind to the selection of videos shown and to the video coding sessions with shelter  
252 employees.

253

## 254 **Data analysis**

255 All data analysis was conducted in R version 3.3.2 [54].

256

### 257 **Validity of behaviour recordings**

258 The validity of shelter employees' recording of behaviour from videos was assessed by  
259 the percentage of participants who identified the 2 videos as showing examples of  
260 aggression.

261

### 262 **Missing data**

263 Data were missing when dogs did not experience particular contexts while at the  
264 shelter. The missing data rate was between 0.06% and 5% for each context, except for  
265 the *Interactions with female dogs* and *Interactions with male dogs* categories which had  
266 17% and 18% of missing values, respectively (because structured interactions with other  
267 dogs did not arise as frequently). Moreover, 16% and 7% of dogs were missing weight  
268 measurement and neuter status data, respectively, which were independent variables  
269 statistically controlled for in subsequent analyses. We created 5 multiply imputed data  
270 sets [55], upon which all of the analyses in the sections below were conducted and  
271 results pooled. The multiple imputation took into account the hierarchical structure of  
272 the data (observations within dogs), all independent variables reported below, and the  
273 data types (ordered binary variables for the context data, positive-continuous for weight



274 measurements, nominal for neuter status). The data were assumed to be missing at  
275 random, that is, dependent only on other variables in the analyses.

276

## 277 **Structural equation models**

278 We used structural equation modelling to assess whether aggression towards people  
279 (contexts: *Handling, In kennel towards people, Out of kennel towards people,*  
280 *Interactions with familiar people, Interactions with unfamiliar people, Eating food,*  
281 *Interactions with toys*) and towards dogs (contexts: *In kennel towards dogs, Out of*  
282 *kennel towards dogs, Interactions with female dogs, Interactions with male dogs*) could  
283 be explained by two latent aggressiveness traits: aggressiveness towards people and  
284 dogs, respectively. We compared a model where the latent variables were orthogonal to  
285 a model where the latent variables were allowed to correlate, since positive correlations  
286 between different aggressiveness traits in dogs have been reported in dogs [56]. Models  
287 were fit using the *lavaan* package [57], with the weighted least squares mean and  
288 variance adjusted (WLSMV) estimator and theta/conditional parameterisation, as  
289 recommended for categorical dependent variables [7,58,59]. The latent variables were  
290 standardised to have mean 0 and variance 1. The results were combined across imputed  
291 data sets using the 'runMI' function in the *semTools* package [60]. The fit of each model  
292 was ascertained using the comparative fit index (CFI) and Tucker Lewis index (TLI),  
293 where values > 0.95 indicate excellent fit, as well as the root mean squared error of

294 approximation (RMSEA) where values < 0.06 indicate good fit [7]. Parameter estimates  
295 were summarised by  $p$  values (considered significant at  $p < 0.05$ ).

296

## 297 **Local independence**

298 We tested the assumption of local independence by re-fitting the best-fitting structural  
299 equation model with residual correlations between context variables. To maintain a  
300 theoretically driven approach (see [61] regarding the best practice of including residual  
301 correlations in structural equation models) and model identifiability, we only tested a  
302 predefined set of residual correlations that we believed to be most relevant. First, we  
303 allowed correlations between *Handling with In kennel towards people*, *Interactions with*  
304 *familiar people*, *Interactions with unfamiliar people* and *Interactions with toys*,  
305 respectively. The *Handling* context could directly succeed these other contexts, leading  
306 to close temporal-spatial relationships, and whether a dog showed aggression in the  
307 *Handling* context may be mediated by a person's decision to handle a dog depending on  
308 the dog's behaviour in preceding contexts. The residual correlation between *Handling*  
309 and *Eating food* was not estimated because shelter employees would be unlikely to  
310 handle a dog while the dog ate its daily meals. The residual correlation between  
311 *Handling* and *Out of kennel towards people* was not estimated because any association  
312 between *Handling* and *Out of kennel towards people* would be mediated by either the  
313 *Interactions with familiar people* or *Interactions with unfamiliar people* context.  
314 Therefore, secondly, we estimated the three-way correlations between *Out of kennel*

315 *towards people, Interactions with familiar people and Interactions with unfamiliar*  
316 *people. Similarly, and lastly, we estimated the three-way correlations between Out of*  
317 *kennel towards dogs, Interactions with female dogs and Interactions with male dogs.*

318

### 319 **Measurement invariance**

320 To test for measurement invariance in each of the latent traits derived from the best  
321 fitting structural equation model, we investigated the response patterns across  
322 aggression contexts related to the same latent aggressiveness trait using Bayesian  
323 hierarchical logistic regression models. Whilst measurement invariance for categorical  
324 data can be ascertained in structural equation model frameworks [58,62], item response  
325 theory is more commonly applied to dichotomously scored variables. In psychometrics,  
326 the 1-parameter item response theory model, or Rasch model, represents the  
327 probability that an individual responds correctly to a particular test item as a logistic  
328 function of i) each individual's latent ability and ii) the item's difficulty level. The Rasch  
329 model can be expressed as a hierarchical logistic regression model [63,64], whereby  
330 individual latent abilities are modelled as individual-specific intercepts (i.e. 'random  
331 intercepts'), the propensity for a correct answer to an item  $i$  is its regression coefficient  
332  $\beta_i$ , and credible interactions between items and relevant independent variables (e.g.  
333 group status) indicate a violation of measurement invariance. Here, the dependent  
334 variable was the binary score for whether or not dogs had shown aggression in each  
335 context and the average probability of aggression across contexts varied by dog,

336 representing latent levels of aggressiveness. Context type, dog age, dog sex and their  
337 interactions were included as categorical independent variables.

338

339 Age was treated as a categorical variable, with categories reflecting general  
340 developmental periods: i) 4 months to 10 months (juvenile dogs before puberty), ii) 10  
341 months to 3 years (dogs maturing from juveniles to adults), iii) 3 years to 6 years  
342 (adults), and iv) 6 years + (older dogs). Broad age categories were chosen due to  
343 potentially large differences in developmental timing between individuals. Age was  
344 categorised because we predicted that aggression would be dependent on these  
345 developmental periods.

346

347 Models included additional demographic variables (see Table 1) that may mediate the  
348 probability of aggression: body weight (average weight if multiple measurements were  
349 taken), total number of days spent at the shelter, the rehoming centre at which dogs  
350 were based (London, Old Windsor, Brands Hatch), neuter status (neutered before  
351 arrival, neutered at the shelter, not neutered) and source type (relinquished by owner,  
352 returned to the shelter after adoption, stray). Categorical variables were represented as  
353 sum-to-zero deflections from the group-level intercept to ensure the intercept  
354 represented the average probability of aggression across categorical levels. Weight and  
355 total days at the shelter were mean-centered and standardised by 2 standard  
356 deviations. Due to the potentially complex relationships between these variables and

357 aggression (e.g. interactive effects between neuter status and sex; [49]), which could  
358 also include violations of measurement invariance, we decided not to interpret their  
359 effects inferentially. Instead, they were included to make the assessment of  
360 measurement invariance between sexes and age groups conditional on variance  
361 explained by potentially important factors.

362

363 For comparability to other studies in animal personality, behavioural repeatability was  
364 calculated across contexts in each model using the intraclass correlation coefficient  
365 (ICC), calculated as  $\frac{\sigma_{\beta}^2}{\sigma_{\beta}^2 + \sigma_{\epsilon}^2}$ , where  $\sigma_{\beta}^2$  represented the between-individual variance of the  
366 probability of aggression (i.e. the variance of the random intercepts), and  $\sigma_{\epsilon}^2$  was  $\pi^2/3$ ,  
367 the residual variance of the standard logistic distribution [65].

368

### 369 **Computation**

370 Models were computed using the probabilistic programming language Stan version 2.12  
371 [66], using Hamiltonian Monte Carlo, a type of Markov Chain Monte Carlo (MCMC)  
372 algorithm, to sample from the posterior distribution (model code supplied in Supporting  
373 Information). Prior distributions for all independent variables were normal distributions  
374 with mean 0 and standard deviation 1, attenuating regression coefficients towards zero  
375 for conservative inference. The prior on the overall intercept parameter was normally  
376 distributed with mean 0 and standard deviation 5. The standard deviation of dog-

377 specific intercept parameters was given a half-Cauchy prior distribution with mean 0  
378 and shape 2. Each model was run with 4 chains of 2,000 iterations with a 1,000 step  
379 warm-up period. The Gelman-Rubin statistic (ideally < 1.05) and visual assessment of  
380 traceplots were used to assess MCMC convergence and we checked the accuracy of the  
381 posterior predicted probabilities of aggression against the raw data. Regression  
382 coefficients were expressed as odds ratios and were summarised by their mean and 95%  
383 Bayesian credibility interval (CI, i.e. the 95% most probable parameter values). To  
384 compare levels of categorical variables and their interactions, we computed the 95% CI  
385 of the differences between the respective posterior distributions.

386

### 387 ***Model selection & parameter inference***

388 Models were run on each imputed data set and their respective posterior distributions  
389 were averaged to attain a single posterior distribution for inference. Adopting a  
390 Bayesian approach allowed the estimation of interaction parameters (i.e. testing  
391 measurement invariance) without requiring corrections for multiple comparisons as in  
392 frequentist null hypothesis testing [67]. Nonetheless, models included a large number of  
393 estimated parameters. Two strategies were employed to guard against over-fitting of  
394 models to data. First, we selected the model with the best out-of-sample predictive  
395 accuracy given the number of parameters based on the Widely Applicable Information  
396 Criterion (WAIC; using the R package *loo* [68]). Four variants of each model were  
397 computed: two-way interactions between contexts and age and contexts and sex,

398 respectively (model 1), a single interaction with sex but not with age (model 2), a single  
399 interaction with age but not with sex (model 3), and no interactions (model 4). All  
400 models included the mediating independent variables above. Second, to avoid testing  
401 point-estimate null hypotheses, the effect of a parameter was only considered credibly  
402 different from zero if the odds ratio exceeded the region of practical equivalence (ROPE;  
403 see [69]) around an odds ratio of 1 from 0.80 to 1.25. An odds ratio of 0.80 or 1.25  
404 indicates a 20% decrease or increase (i.e. 4/5 or 5/4 odds), respectively, in the odds of  
405 an outcome, frequently used in areas of bioequivalence testing (e.g. [70]), which we  
406 here considered to be small enough to demonstrate a negligible effect in the absence of  
407 additional information. If a 95% CI fell completely within the ROPE, the null hypothesis  
408 of no credible influence of that parameter was accepted; if a 95% CI spanned the ROPE  
409 (i.e. included part of the ROPE), then the parameter's influence was left undecided [69].

410

## 411 **Ethics statement**

412 Permission to access and utilise the data was given by the shelter after signing a non-  
413 disclosure agreement. Approval from an ethical review board was not required for this  
414 study.

415

## 416 **Data accessibility**

417 The data used in this study are protected by a non-disclosure agreement. Researchers  
418 can access the data by contacting Battersea Dogs and Cats Home.

419

## 420 **Results**

### 421 **Validity of behaviour recordings**

422 For the video showing aggression towards people, 51.61% of participants identified the  
423 behaviour as aggression and 41.94% identified the behaviour as non-aggressive but  
424 reactive behaviour (see definitions above). For the video showing aggression towards  
425 dogs, 52.69% identified the behaviour correctly and 44.09% identified the behaviour as  
426 non-aggressive but reactive behaviour. For the 12 other videos not showing aggression,  
427 only 1 person coded a video as aggression towards people and 3 people coded videos as  
428 aggression towards dogs.

429

### 430 **Structural equation models**

431 The raw tetrachoric correlation matrix for aggression between contexts is presented in  
432 Table S2. Both structural equation models demonstrated excellent fit, with the model



433 with correlated latent variables fitting marginally better (CFI: 0.97; TLI: 0.96; RMSEA:  
434 0.03) than the model with uncorrelated variables (CFI: 0.96; TLI: 0.95; RMSEA 0.04). All  
435 regression coefficients of the model with correlated latent variables were positive and  
436 significant (Table 3), and latent variables shared a significant positive correlation ( $\rho =$   
437 0.25;  $p < 0.001$ ; Table 3).

438

### 439 **Local independence**

440 Allowing the pre-defined residuals to co-vary in the structural equation model resulted  
441 in marginally better fit (CFI = 0.98; TLI = 0.97; RMSEA: 0.03). A significant negative  
442 correlation was observed between *Handling* and *In kennel towards people* contexts ( $\rho =$   
443  $-0.67$ ;  $p = 0.003$ ; Table 4), and *Handling* and *Interactions with unfamiliar people* contexts  
444 ( $\rho = -0.55$ ;  $p = 0.01$ ; Table 4). Significant positive correlations were observed between  
445 *Handling* and *Interactions with toys* contexts ( $\rho = 0.15$ ;  $p = 0.04$ ; Table 4), and *Out of*  
446 *kennel towards people* with the *Interactions with unfamiliar people* context ( $\rho = 0.27$ ;  $p =$   
447  $< 0.001$ ; Table 4). No significant residual correlations between contexts reflecting  
448 aggressiveness towards dogs were observed (Table 4).

449

450

**Table 3. Structural equation model parameter estimates.**

| Parameter                                        | Estimate | SE   | z value | p value |
|--------------------------------------------------|----------|------|---------|---------|
| Handling <sup>a</sup>                            | 0.83     | 0.06 | 15.07   | < 0.001 |
| In kennel towards people <sup>a</sup>            | 1.31     | 0.09 | 15.00   | < 0.001 |
| Out of kennel towards people <sup>a</sup>        | 0.33     | 0.07 | 12.60   | < 0.001 |
| Interactions with familiar people <sup>a</sup>   | 0.99     | 0.07 | 14.81   | < 0.001 |
| Interactions with unfamiliar people <sup>a</sup> | 1.58     | 0.12 | 12.97   | < 0.001 |
| Eating food <sup>a</sup>                         | 0.73     | 0.06 | 13.02   | < 0.001 |
| Interactions with toys <sup>a</sup>              | 0.54     | 0.07 | 8.04    | < 0.001 |
| In kennel towards dogs <sup>b</sup>              | 0.75     | 0.06 | 11.74   | < 0.001 |
| Out of kennel towards dogs <sup>b</sup>          | 0.50     | 0.04 | 11.87   | < 0.001 |
| Interactions with female dogs <sup>b</sup>       | 0.94     | 0.07 | 11.19   | < 0.001 |
| Interactions with male dogs <sup>b</sup>         | 0.89     | 0.07 | 12.66   | < 0.001 |
| Correlation: People ~ Dogs                       | 0.25     | 0.03 | 7.50    | < 0.001 |

Parameter estimates from the best-fitting structural equation model, explaining aggression by two correlated latent variables.

<sup>a</sup> Contexts reflecting aggressiveness towards people

<sup>b</sup> Contexts reflecting aggressiveness towards dogs

451

452

**Table 4. Tests of local independence.**

| <b>Residual correlations</b>                                                         | <b>Estimate</b> | <b>SE</b> | <b>z value</b> | <b>p value</b> |
|--------------------------------------------------------------------------------------|-----------------|-----------|----------------|----------------|
| Handling ~ In kennel towards people <sup>a</sup>                                     | -0.67           | 0.22      | -3.01          | 0.003          |
| Handling ~ Interactions with familiar people <sup>a</sup>                            | 0.15            | 0.09      | 1.72           | 0.09           |
| Handling ~ Interactions with unfamiliar people <sup>a</sup>                          | -0.55           | 0.21      | -2.66          | 0.01           |
| Handling ~ Interactions with toys <sup>a</sup>                                       | 0.15            | 0.07      | 2.06           | 0.04           |
| Out of kennel towards people ~ Interactions with familiar people <sup>a</sup>        | 0.04            | 0.08      | 0.51           | 0.61           |
| Out of kennel towards people ~ Interactions with unfamiliar people <sup>a</sup>      | 0.27            | 0.09      | 3.20           | 0.001          |
| Interactions with familiar people ~ Interactions with unfamiliar people <sup>a</sup> | 0.003           | 0.11      | 0.02           | 0.98           |
| Out of kennel towards dogs ~ Interactions with female dogs <sup>b</sup>              | -0.65           | 0.63      | -1.04          | 0.30           |
| Out of kennel towards dogs ~ Interactions with male dogs <sup>b</sup>                | -0.41           | 0.67      | -1.08          | 0.27           |
| Interactions with female dogs ~ Interactions with male dogs <sup>b</sup>             | -0.28           | 0.57      | -0.50          | 0.62           |

Estimated residual correlations between *a priori* defined structural equation model parameters.

<sup>a</sup> Contexts reflecting aggressiveness towards people

<sup>b</sup> Contexts reflecting aggressiveness towards dogs

453

#### 454 **Measurement invariance**

455 Separate models were run for contexts reflecting aggressiveness towards people and

456 aggressiveness towards dogs. For all models, all Gelman-Rubin statistics were all < 1.01,

457 effective sample sizes for all parameters were > 1000, and traceplots showed good  
458 mixing. Posterior predictive checks of model estimates reflected the raw data (Figs 1  
459 and 2). The full measurement invariance model (model 1) including interactions  
460 between contexts and sex and contexts and age groups had the best out-of-sample  
461 predictive accuracy for both the aggressiveness towards people and aggressiveness  
462 towards dog models, respectively, illustrated by the lowest WAIC values (Table 5). Since  
463 some models included numerous interactions, we provide an overall summary of the  
464 main results below (Figs 1 and 2) with full parameter estimates provided in Tables S3  
465 and S4.

**Table 5. Bayesian hierarchical model selection using WAIC.**

| <b>Model</b> | <b>Aggressiveness towards people</b> | <b>Aggressiveness towards dogs</b> |
|--------------|--------------------------------------|------------------------------------|
| Model 1      | 13405.6 ± 179.0                      | 15257.2 ± 133.1                    |
| Model 2      | 13506.3 ± 179.6                      | 15381.4 ± 133.4                    |
| Model 3      | 13426.3 ± 179.1                      | 15285.3 ± 133.0                    |
| Model 4      | 13521.7 ± 179.5                      | 15407.6 ± 133.4                    |

Mean ± standard error of the Widely Applicable Information Criteria (WAIC) values per model and latent variable (aggressiveness towards people and dogs, respectively), used to assess measurement invariance: model 1 (age x context and sex x context interactions), model 2 (sex x context interaction only), model 3 (age x context interaction only), model 4 (no interactions). Models with the lowest WAIC values are estimated to have the best out-of-sample predictive accuracy.

466

#### 467 **Aggressiveness towards people**

468 The odds of aggression towards people, across categorical predictors and for an average  
469 dog of mean weight and length of stay at the shelter, were 0.022 (CI: 0.021 to 0.024), a

470 probability of approximately 2%. On average, aggression was most likely in the *In kennel*  
471 *towards people* context (OR = 0.054; CI: 0.049 to 0.058) and least probable in the  
472 *Interactions with toys* context (OR = 0.008; CI: 0.007 to 0.009).

473

474 Aggression was less likely across contexts for females than males (OR = 0.719; CI: 0.668  
475 to 0.770), although there were also credible interactions between sex and contexts (Fig  
476 1a; Table S3). Whereas males and females had similar odds of aggression in the *Out of*  
477 *kennel towards people* context, smaller differences were observed between *Out of*  
478 *kennel towards people* and *Handling* (OR = 0.578; CI: 0.481 to 0.682), *Eating food* (OR =  
479 1.812; CI: 1.495 to 2.152) and *Interactions with familiar people* (OR = 1.798; CI: 1.488 to  
480 2.126) contexts in females compared to males. Aggression in the *Interactions with*  
481 *unfamiliar people* context was also similar between males and females, while larger  
482 differences were observed between *Interactions with unfamiliar people* and *Handling*  
483 (OR = 0.616; CI: 0.530 to 0.702), *Eating food* (OR = 0.594; CI: 0.506 to 0.686) and  
484 *Interactions with familiar people* (OR = 0.598; CI: 0.513 to 0.687) contexts in females  
485 compared to males.

486

487 Apart from lower odds of aggression in 4 to 10 month olds compared to 10 month to 3  
488 year old dogs (OR = 0.638; CI: 0.565 to 0.705), there was no simple influence of age  
489 group on aggressiveness. Between the 4 to 10 months old and 3 to 6 years old groups,  
490 differences between the odds of aggression across contexts varied due to an increase of

491 aggression in certain contexts but not others (Fig 1b; Table S4). Aggression in *In kennel*  
492 *towards people* and *Interactions with unfamiliar people* contexts particularly increased,  
493 leading to larger differences between, for example, *In kennel towards people* and *Eating*  
494 *food* (OR = 0.524; CI: 0.400 to 0.642) and *Eating food* and *Interactions with unfamiliar*  
495 *people* (OR = 1.721; CI: 1.403 to 2.059) contexts for 10 month to 3 year olds compared  
496 to 4 to 10 month olds, and between *In kennel towards people* and *Out of kennel towards*  
497 *people* (OR = 0.470; CI: 0.355 to 0.606) and *Out of kennel towards people* and  
498 *Interactions with unfamiliar people* (OR = 2.051; CI: 1.608 to 2.543) contexts in 3 to 6  
499 year olds compared to 4 to 10 month olds. In 3 to 6 year old compared to 10 month to 3  
500 year old dogs, aggression increased in the *Handling* and *Eating food* contexts but  
501 decreased in the *Out of kennel towards people* context, resulting in larger differences  
502 between, for instance, *Handling* and *Out of kennel towards people* (OR = 0.526; CI: 0.409  
503 to 0.631) and *Out of kennel towards people* and *Interactions with unfamiliar people* (OR  
504 = 2.349; CI: 1.891 to 2.925), and smaller differences between *Eating food* and  
505 *Interactions with familiar people* (OR = 0.576; CI: 0.468 to 0.687).

506

507 Dogs over 6 years old demonstrated qualitatively different response patterns across  
508 certain contexts than all other age groups. While aggression was most probable in *In*  
509 *kennel towards people* and *Interactions with unfamiliar people* contexts for dogs aged 4  
510 months through 6 years, dogs over 6 years old were most likely to show aggression in  
511 the *Handling* context, leading to interactions between, for example, *Handling* and *In*  
512 *kennel towards people*, and between *Handling* and *Interactions with unfamiliar people*

513 contexts compared to the other age groups (Fig 1b; Table S3). Aggression when *Eating*  
514 *food* and in *Interactions with toys* contexts also increased compared to that expressed  
515 by younger dogs, resulting in credible differences between, for instance, *Eating food* and  
516 *Interactions with familiar people* contexts between dogs aged 10 months to 3 years and  
517 over 6 years (OR = 0.379; CI: 0.300 to 0.465) and between *Out of kennel towards people*  
518 and *Interactions with toys* contexts between over 6 year olds and all other age groups  
519 (Table S3).

520

a

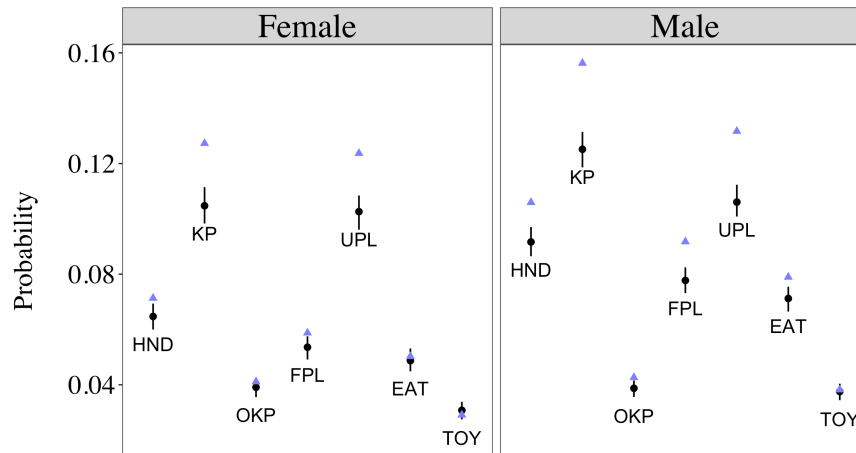

b

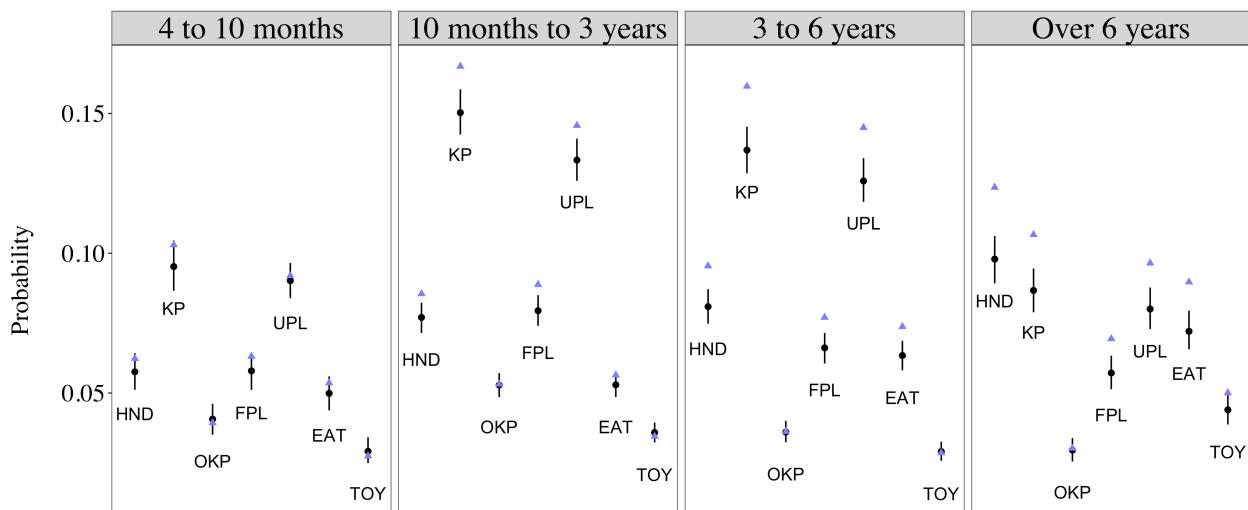

**Fig 1. Predicted probabilities of aggression towards people in different contexts by sex (panel a) and age groups (panel b).** Black points and vertical lines show mean and 95% credibility intervals of model parameter estimates; blue triangles show raw sample data. Abbreviations used in the figure: HND (*Handling*); KP (*In kennel towards people*); OKP (*Out of kennel towards people*); FPL (*Interactions with familiar people*); UPL (*Interactions with unfamiliar people*); EAT (*Eating food*); TOY (*Interactions with toys*).

521

522



## 523 **Aggressiveness towards dogs**

524 The odds of aggression towards dogs, across categorical predictors and for an average  
525 dog of mean weight and length of stay at the shelter, was 0.176 (CI: 0.168, 0.184),  
526 corresponding to a probability of approximately 15%. Dogs were most likely to show  
527 aggression in the *Interactions with male dogs* context (OR = 0.297; CI: 0.198 to 0.217)  
528 and least likely in the *In kennel towards dogs* context (OR = 0.099; CI: 0.094 to 0.104; Fig  
529 2; Table S4).

530

531 No credible mean-level differences existed between females and males (OR = 1.187; CI:  
532 1.128 to 1.250). However, the difference in aggression between the *Interactions with*  
533 *female dogs* and *Interactions with male dogs* contexts was smaller for females (OR =  
534 1.542; CI: 1.400 to 1.704; Fig 2a; Table S4), as were the differences between *Interactions*  
535 *with male dogs* and *In kennel towards dogs* (OR = 0.661; CI: 0.590 to 0.732) and *In*  
536 *kennel towards dogs* and *Out of kennel towards dogs* (OR = 1.420; CI: 1.269 to 1.587).  
537 Females were also more likely to show aggression in *Interactions with female dogs* than  
538 *Out of kennel towards dogs* compared to males (OR = 1.444; CI: 1.301 to 1.603).

539

540 Dogs aged 4 to 10 months old had credibly lower odds of aggression towards dogs than  
541 older dogs across contexts (Fig 2b; Table S4). However, contexts and age also showed  
542 interactive effects. In particular, aggression in *Interactions with female dogs* and

543 *Interactions with male dogs* contexts tended to increase relative to other contexts. For  
544 instance, the relationship between *Interactions with female dogs* and *Out of kennel*  
545 *towards dogs* contexts reversed in direction between 4 to 10 month and 10 month to 3  
546 year olds (OR = 0.595; CI: 0.495 to 0.688) as did the relationship between *Interactions*  
547 *with male dogs* and *Out of kennel towards dogs* contexts (OR = 0.499; CI: 0.422 to  
548 0.575). The relationship between *In kennel towards dogs* and *Out of kennel towards*  
549 *dogs* contexts also changed across age groups (Fig 2b; Table S4). Four to 10 months old  
550 were more likely to show aggression in *Out of kennel towards dogs* than *In kennel*  
551 *towards dogs* contexts, but the difference was smaller in 10 months to 3 year olds (OR =  
552 0.608; CI: 0.505 to 0.728) and in over 6 year olds (OR = 0.396; CI: 0.316 to 0.481). The  
553 latter relationship was reversed in 3 to 6 year olds compared to 4 to 10 month old dogs  
554 (OR = 0.277; CI: 0.227 to 0.331) and 10 month to 3 year old dogs (OR = 0.456; CI: 0.396  
555 to 0.516).

556

a

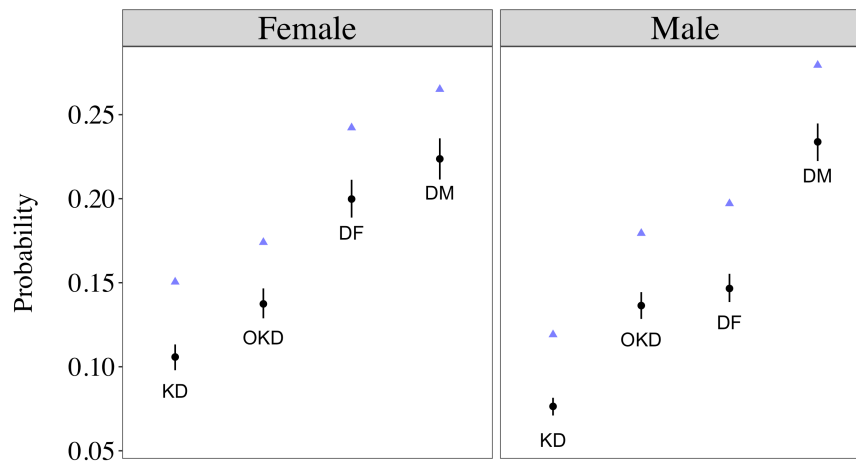

b

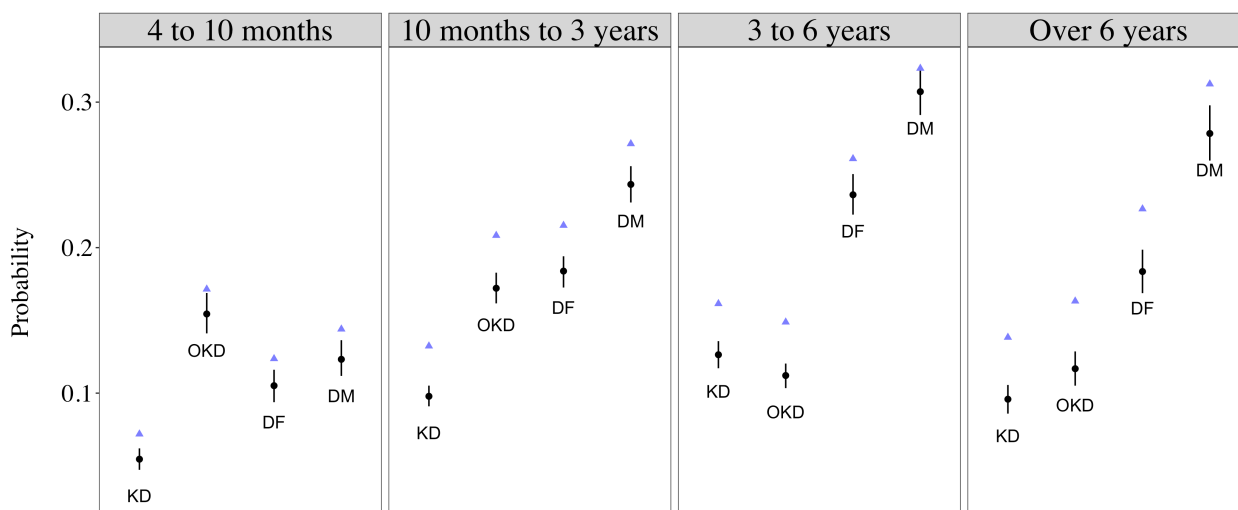

**Fig 2. Predicted probabilities of aggression towards dogs in different contexts by sex (panel a) and age groups (panel b).** Black points and vertical lines show mean and 95% credibility intervals of model parameter estimates; blue triangles show raw sample data. Abbreviations used in the figure: KD (*In kennel towards dogs*); OKD (*Out of kennel towards dogs*); DF (*Interactions with female dogs*); DM (*Interactions with male dogs*).

557

558

## 559 **Repeatability**

560 Both aggressiveness towards people and dog showed moderate repeatability across  
561 contexts ( $ICC_{people} = 0.479$ ; CI: 0.466, 0.491;  $ICC_{dogs} = 0.303$ ; CI: 0.291, 0.315),  
562 although aggressiveness towards people was more repeatable than aggressiveness  
563 towards dogs ( $ICC_{difference} = 0.176$ ; CI: 0.158, 0.192).

564

## 565 **Discussion**

566 In this study, we have examined whether local independence and measurement  
567 invariance hold for hypothesised latent aggressiveness traits in shelter dogs.  
568 Observational recordings of aggression directed towards people and dogs across  
569 different shelter contexts were explained by two positively correlated latent variables,  
570 and behaviour across contexts was moderately repeatable. These results are consistent  
571 with the definition of animal personality as behaviour that shows moderately consistent  
572 between-individual differences across time or contexts [4], and characterised by  
573 multiple observed behaviours being decomposed into lower-dimensional behavioural  
574 traits. Yet, subsequent investigations indicated violations of local independence and  
575 measurement invariance, questioning the validity of the latent variables as  
576 homogeneous personality traits. While a number of factors may contribute to the low  
577 predictive validity of certain dog personality assessments [48], ensuring the robustness  
578 of inferences made about personality traits is critical, especially considering the large

579 number of traits that have been proposed [34,35]. Given the popularity of latent  
580 variable models, such as exploratory and confirmatory factor analysis (e.g. [17,29,71]),  
581 to understand the organisation of personality in dogs, ascertaining local independence  
582 and measurement invariance of personality traits should be routine practice, as it has  
583 become in human (personality) psychology (e.g. [26,72–74]).

584

585 Local independence implies that the association between manifest variables is greater  
586 than that explained by the latent variable. Here, local independence was investigated  
587 between manifest variables that were believed to have close temporal-spatial  
588 relationships. While local independence was confirmed for contexts reflecting  
589 aggressiveness towards dogs, contexts reflecting aggressiveness towards people showed  
590 a violation of local independence. Aggression in the *Handling* context shared a negative  
591 residual correlation with both the *In kennel towards people* and *Interactions with*  
592 *unfamiliar people* contexts, while positive residual correlations were present between  
593 *Handling* and *Interactions with toys*, and *Out of kennel towards people* and *Interactions*  
594 *with unfamiliar people* contexts (Table S4). Violations of local independence may arise  
595 through shared method variance [75–78] or unmodelled latent variables influencing  
596 manifest variables [79,80]. For example, if a dog showed aggression when an unfamiliar  
597 person approached, it may be less likely to be handled by that person, inducing a  
598 negative residual correlation conditional on latent levels of aggression as was observed  
599 here between the *Handling* and *Interactions with unfamiliar people* contexts. Likewise,  
600 the *Handling* context and the *Interactions with toys* contexts are similar in that both

601 require dog and person to be close together, and interacting with toys and handling may  
602 co-occur at the same time, inducing a positive residual correlation between contexts.

603

604 While authors have argued that greater standardisation and validation of personality  
605 assessments is key to ensuring the accurate measurement of underlying traits [34,46], it  
606 may be untenable to avoid dependencies between testing contexts. Displays of  
607 aggression in one sub-test will likely change how people conduct future sub-tests with  
608 the same dog, regardless of test standardisation. Moreover, the hierarchical structure of  
609 animal personality, including the presence of behavioural syndromes, makes the  
610 isolated measurement of one trait unrealistic [75]. For instance, the positive residual  
611 correlation between *Out of kennel towards people* and *Interactions with unfamiliar*  
612 *people* may be mediated by additional traits of interest to personality researchers, such  
613 as fearfulness or anxiety [29,81], if dogs who are fearful of interacting with unfamiliar  
614 people are more likely to show aggression beyond that described by a latent  
615 aggressiveness trait. Some human psychologists have argued that violations of local  
616 independence are a natural consequence of the organisation of behaviour as a complex  
617 dynamic system [82,83], which unfolds with respect to time- and context-dependent  
618 constraints [84]. Thus, awareness of local independence and its violation could facilitate  
619 closer understanding of the dynamics driving personality test responses beyond  
620 explanations purely based on personality traits.

621

622 While different subsets of a population may differ in mean levels of trait expression,  
623 interactions between behavioural responses and those subsets indicate that the same  
624 phenomenon is not under measurement across groups [23,24]. Using a Bayesian  
625 hierarchical model analogous to the Rasch model, we found that the probability of  
626 aggression across contexts was still dependent on sex and age conditional on latent  
627 levels of aggressiveness towards people and dog (Figs 1 and 2; Tables S3 and S4),  
628 indicating the violation of measurement invariance. Female dogs, for example, were  
629 more likely than males to show aggression in *Out of kennel towards people* and  
630 *Interactions with unfamiliar people* contexts relative to other contexts (Fig 1a). Females  
631 also demonstrated similar odds of aggression during *Interactions with female dogs* and  
632 *Interactions with male dogs*, whereas males were more likely to show aggression  
633 towards male than female dogs (Fig 2a). Thus, latent levels of aggressiveness did not  
634 easily explain differences in aggression across contexts. As with local independence,  
635 different behavioural variables unaccounted for in this study may also result in  
636 violations of measurement invariance. For instance, while dogs up to 6 years old were  
637 most likely to show aggression in *In kennel towards people* and *Interactions with*  
638 *unfamiliar people contexts*, dogs over 6 years old demonstrated aggression most  
639 commonly in the *Handling* context, which may reflect an increase in pain-motivated  
640 aggression. Dogs over 6 years old also showed an increase in aggression in the *Eating*  
641 *food* and *Interactions with toys* contexts relative to other age groups, suggesting that  
642 older dogs in shelter populations may be less tolerant during close interactions with

643 people (i.e. handling, people in the vicinity of their food and toys) compared to other  
644 contexts.

645

646 Investigating factors that predict a dog's personality, or whether a dog's personality  
647 predicts other outcomes of interest (e.g. future behavioural scores; [39,40]), is also of  
648 substantive interest to researchers. Persson *et al.* [32] found interactive effects between  
649 sex and age on human-directed social behaviour traits. Moreover, Asp *et al.* [56] found  
650 that sex and age interacted with breed in explaining differences in C-BARQ trait scores.  
651 To ensure the robustness of their conclusions, however, researchers should ensure that  
652 the traits being investigated satisfy model assumptions, not only for statistical accuracy,  
653 but so that interpreting the difference between individuals as a function of trait scores is  
654 both feasible and meaningful.

655

656 Local independence and measurement invariance are assumptions of confirmatory,  
657 reflective latent variable models, but are not required assumptions for formative  
658 models, which posit that the latent variable is simply a linear composite of manifest  
659 variables, rather than a causal, underlying variable [20]. While formative models such as  
660 principal components analysis (e.g. [32,33,85]) may, as a result, appear attractive and  
661 continue to be used in dog personality studies, their use has been discouraged. Principal  
662 components analysis will always result in lower-dimensional variables comprised of  
663 linear combinations of manifest variables, even when those manifest variables are



664 uncorrelated random variables (e.g. see [12]). Consequently, finding principal  
665 components that underlie behavioural data is neither surprising nor evidence for the  
666 discovery of domain-general personality traits. Crucially, for personality traits to be of  
667 use in understanding the organisation of dog behaviour or be considered as predictors  
668 of future dog behaviour, they should, arguably, hold causal status. In human psychology,  
669 Schimmack [86] and Borsboom [6] note the importance of interpreting latent variables  
670 as causal variables for understanding unobserved constructs, such as personality traits.  
671 To this end, reflective models, especially confirmatory approaches such as structural  
672 equation modelling or item response theory, present a more powerful framework to  
673 distinguish signal from noise in multivariate behavioural data [20,86] and are concurrent  
674 with a theoretical interpretation of personality traits as causal variables underpinning  
675 animal behaviour [16]. Increasing the popularity of such approaches could be  
676 particularly helpful in evaluating the reproducibility of dog personality traits across  
677 existing studies.

678

679 Although we have identified violations of both local independence and measurement  
680 invariance, we remain cautious about hypothesising *a posteriori* about their causes. A  
681 problem for the wider perspective of animal personality research is that personality  
682 traits are typically defined operationally, based on the statistical repeatability of  
683 quantifiable behaviour [77,87,88]. As has been discussed in human personality  
684 psychology, operational definitions are ontologically ambiguous [89,90]. That is, while  
685 operational definitions facilitate experimentation in animal personality [4], they are

686 ambiguous with respect to the biological mechanisms underlying trait expression. For  
687 example, Budaev and Brown remark that boldness, defined as a propensity to take risks,  
688 could encompass a range of distinct personality traits, each with a different biological  
689 basis [75]. Whilst reflective latent variable models allow researchers to test hypotheses  
690 about the relatedness of measured behaviours via one or more underlying traits, they  
691 have also been criticised as ambiguous [81]. For example, it is uncertain what reflective  
692 latent variables may represent in biological organisation [89] or even whether they are  
693 features individuals possess or simply emergent features of between-individual  
694 differences [91,92]. Such considerations highlight the importance of research on the  
695 proximate mechanisms of personality [87] and longitudinal data analyses to separate  
696 between- from within-individual behavioural variation [93,94].

697

698 A number of authors have emphasised the poor predictive value of aggression tests in  
699 shelter dogs compared to tests of other traits [37,39,48]. The low occurrence of  
700 aggression can make its accurate measurement difficult [39], and some studies actively  
701 exclude dogs that have shown aggression in the shelter (e.g. [39]). The probability of  
702 observing aggression recorded in this study was low, especially in contexts reflecting  
703 aggressiveness towards people (Fig 1). Nonetheless, evaluation of the validity of the  
704 behavioural recordings indicated that shelter employees might mistake observations of  
705 aggression for non- aggressive responses (e.g. over-excitement and frustration when  
706 seeing people/dogs), meaning that the true probability of aggression was potentially  
707 under-estimated (although incorrectly coding other behaviours as aggression also

708 occurred, albeit rarely). Infrequent occurrence and/or recording of aggression may also  
709 limit accurate predictions of future behaviour. Patronek and Bradley [48] demonstrate  
710 using simulation that the low prevalence of aggression inflates the chance that  
711 aggression shown in a shelter assessment represents a false positive. In general, our  
712 results support this conclusion in the sense that aggression may be shown differentially  
713 across contexts not explained by latent levels of aggressiveness. Violations of local  
714 independence and measurement invariance as found here indicate, further, that it is not  
715 only the difference between false and true positives and negatives, but the validity of  
716 inferring homogeneous personality traits by which to compare individual dogs, that  
717 needs careful consideration. Consequently, we agree with recommendations to  
718 establish the efficacy of longitudinal, observational assessments rather than relying on a  
719 single assessment made using a traditional test battery [31,39,48]. This approach will  
720 prioritise the cumulative understanding of a dog's context-dependent behaviour and  
721 help to guide decisions about the potential risk a dog poses to humans and other  
722 animals.

723

## 724 **Conclusion**

725 This study has tested the assumptions of local independence and measurement  
726 invariance of personality traits in shelter dogs. Using structural equation modelling,  
727 aggression across behavioural contexts was explained by two, correlated latent  
728 variables and demonstrated repeatability. Nevertheless, significant residual correlations

729 remained between certain behavioural contexts related to aggressiveness towards  
730 people, violating the assumption of local independence. In addition, aggression in  
731 different contexts showed differential patterns of response across sex and age,  
732 indicating a lack of measurement invariance. Violations of local independence and  
733 measurement invariance imply that aggressiveness towards people and dogs may not  
734 be enough to explain patterns of aggression in different contexts, or that inferences  
735 based on these hypothesised personality traits may in fact be misleading. We encourage  
736 researchers to more closely assess the measurement assumptions underlying reflective  
737 latent variable models before making conclusions about the effects of, or factors  
738 influencing, personality.

739

## 740 **Acknowledgements**

741 The authors are grateful to Battersea Dogs and Cats Home for allowing us to access the  
742 data for this study.

743

## 744 **References**

745 1. Dochtermann NA, Jenkins SH. Behavioural syndromes in Merriam's kangaroo rats  
746 (*Dipodomys merriami*): a test of competing hypotheses. *Proc R Soc Biol Sci.* 2007;274:  
747 2343–2349. doi:10.1098/rspb.2007.0622

- 748 2. Dochtermann NA, Dingemanse NJ. Behavioral syndromes as evolutionary constraints.  
749 Behav Ecol. 2013; art002. doi:10.1093/beheco/art002
- 750 3. Westneat DF, Wright J, Dingemanse NJ. The biology hidden inside residual within-  
751 individual phenotypic variation. Biol Rev Camb Philos Soc. 2015;90: 729–743.  
752 doi:10.1111/brv.12131
- 753 4. Réale D, Reader SM, Sol D, McDougall PT, Dingemanse NJ. Integrating animal  
754 temperament within ecology and evolution. Biol Rev Camb Philos Soc. 2007;82: 291–  
755 318. doi:10.1111/j.1469-185X.2007.00010.x
- 756 5. Sih A, Bell AM, Johnson JC, Ziemba RE. Behavioral syndromes: an integrative  
757 overview. Q Rev Biol. 2004;79: 241–277. doi:10.1086/422893
- 758 6. Spearman C. “General intelligence,” objectively determined and measured. Am J  
759 Psychol. 1904;15: 201–292. doi:10.2307/1412107
- 760 7. Beaujean AA. Latent variable modeling using R: A step-by-step guide. New York:  
761 Routledge; 2014.
- 762 8. Bollen KA. Latent variables in psychology and the social sciences. Annu Rev Psychol.  
763 2002;53: 605–634. doi:10.1146/annurev.psych.53.100901.135239
- 764 9. Borsboom D. The attack of the psychometricians. Psychometrika. 2006;71: 425–440.  
765 doi:10.1007/s11336-006-1447-6

- 766 10. Budaev DS. How many dimensions are needed to describe temperament in animals:  
767 a factor reanalysis of two data sets. *Int J Comp Psychol*. <http://cogprints.org/5478/>;  
768 1998.
- 769 11. Bollen K, Lennox R. Conventional wisdom on measurement: a structural equation  
770 perspective. *Psychol Bull*. 1991;110: 305–314. doi:10.1037/0033-2909.110.2.305
- 771 12. Budaev SV. Using principal components and factor analysis in animal behaviour  
772 research: caveats and guidelines. *Ethology*. 2010;116: 472–480. doi:10.1111/j.1439-  
773 0310.2010.01758.x
- 774 13. Dingemanse NJ, Dochtermann N, Wright J. A method for exploring the structure of  
775 behavioural syndromes to allow formal comparison within and between data sets. *Anim*  
776 *Behav*. 2010;79: 439–450. doi:10.1016/j.anbehav.2009.11.024
- 777 14. Fabrigar LR, Wegener DT, MacCallum RC, Strahan EJ. Evaluating the use of  
778 exploratory factor analysis in psychological research. *Psychol Methods*. 1999;4: 272–  
779 299. doi:10.1037/1082-989X.4.3.272
- 780 15. Preacher KJ, MacCallum RC. Repairing Tom Swift’s electric factor analysis machine.  
781 *Understanding Statistics*. 2003;2: 13–43. doi:10.1207/S15328031US0201\_02
- 782 16. Araya-Ajoy YG, Dingemanse NJ. Characterizing behavioural “characters”: An  
783 evolutionary framework. *Proc R Soc B*. 2014;281: 20132645.  
784 doi:10.1098/rspb.2013.2645

- 785 17. Arden R, Adams MJ. A general intelligence factor in dogs. *Intelligence*. 2016;55: 79–  
786 85. doi:10.1016/j.intell.2016.01.008
- 787 18. van den Berg SM, Heuven HCM, van den Berg L, Duffy DL, Serpell JA. Evaluation of  
788 the C-BARQ as a measure of stranger-directed aggression in three common dog breeds.  
789 *Appl Anim Behav Sc*. 2010;124: 136–141. doi:10.1016/j.applanim.2010.02.005
- 790 19. Bartholomew DJ. Factor analysis for categorical data. *J R Stat Soc Series B Stat*  
791 *Methodol*. 1980;42: 293–321.
- 792 20. Markus KA, Borsboom D. *Frontiers of test validity theory: Measurement, causation,*  
793 *and meaning*. 1st ed. New York, N.Y: Routledge; 2013.
- 794 21. Drasgow F. Study of the measurement bias of two standardized psychological tests.  
795 *Journal of Applied Psychology*. 1987;72: 19–29. doi:10.1037/0021-9010.72.1.19
- 796 22. Mellenbergh GJ. Item bias and item response theory. *Int J Educ Res*. 1989;13: 127–  
797 143. doi:10.1016/0883-0355(89)90002-5
- 798 23. Meredith W. Measurement invariance, factor analysis and factorial invariance.  
799 *Psychometrika*. 1993;58: 525–543. doi:10.1007/BF02294825
- 800 24. Reise SP, Widaman KF, Pugh RH. Confirmatory factor analysis and item response  
801 theory: two approaches for exploring measurement invariance. *Psychol Bull*. 1993;114:  
802 552–566. doi:10.1037/0033-2909.114.3.552

- 803 25. Jansen BRJ, van der Maas HLJ. Statistical test of the rule assessment methodology by  
804 latent class analysis. *Dev Rev.* 1997;17: 321–357. doi:10.1006/drev.1997.0437
- 805 26. Wicherts JM, Dolan CV. Measurement invariance in confirmatory factor analysis: an  
806 illustration using IQ test performance of minorities. *Educ Meas Issues Pract.* 2010;29:  
807 39–47. doi:10.1111/j.1745-3992.2010.00182.x
- 808 27. Widaman KF, Reise SP. Exploring the measurement invariance of psychological  
809 instruments: applications in the substance use domain. In: Bryant KJ, Windle M, West  
810 SG, editors. *The science of prevention: Methodological advances from alcohol and*  
811 *substance abuse research.* Washington, DC, US: American Psychological Association;  
812 1997. pp. 281–324.
- 813 28. Goddard ME, Beilharz RG. Genetic and environmental factors affecting the suitability  
814 of dogs as Guide Dogs for the Blind. *Theor Appl Genet.* 1982;62: 97–102.  
815 doi:10.1007/BF00293339
- 816 29. Hsu Y, Serpell JA. Development and validation of a questionnaire for measuring  
817 behavior and temperament traits in pet dogs. *J Am Vet Med Assoc.* 2003;223: 1293–  
818 1300. doi:10.2460/javma.2003.223.1293
- 819 30. Scott JP, Fuller JL. *Genetics and the social behavior of the dog.* University of Chicago  
820 Press; 2012.



- 821 31. Rayment DJ, Groef BD, Peters RA, Marston LC. Applied personality assessment in  
822 domestic dogs: limitations and caveats. *Appl Anim Behav Sci.* 2015;163: 1–18.  
823 doi:10.1016/j.applanim.2014.11.020
- 824 32. Persson ME, Wright D, Roth LSV, Batakis P, Jensen P. Genomic regions associated  
825 with interspecies communication in dogs contain genes related to human social  
826 disorders. *Sci Rep.* 2016;6. doi:10.1038/srep33439
- 827 33. Sundman A-S, Johnsson M, Wright D, Jensen P. Similar recent selection criteria  
828 associated with different behavioural effects in two dog breeds. *Genes Brain Behav.*  
829 2016;15: 750–756. doi:10.1111/gbb.12317
- 830 34. Jones AC, Gosling SD. Temperament and personality in dogs (*Canis familiaris*): a  
831 review and evaluation of past research. *Appl Anim Behav Sci.* 2005;95: 1–53.  
832 doi:10.1016/j.applanim.2005.04.008
- 833 35. Fratkin JL, Sinn DL, Patall EA, Gosling SD. Personality consistency in dogs: a meta-  
834 analysis. *PLOS ONE.* 2013;8: e54907. doi:10.1371/journal.pone.0054907
- 835 36. Posluns JA, Anderson RE, Walsh CJ. Comparing two canine personality assessments:  
836 convergence of the MCPQ-R and DPQ and consensus between dog owners and dog  
837 walkers. *Appl Anim Behav Sci.* doi:10.1016/j.applanim.2016.12.013
- 838 37. Bennett SL, Litster A, Weng H-Y, Walker SL, Luescher AU. Investigating behavior  
839 assessment instruments to predict aggression in dogs. *Appl Anim Behav Sci.* 2012;141:  
840 139–148. doi:10.1016/j.applanim.2012.08.005

- 841 38. Mohan-Gibbons H, Weiss E, Slater M. Preliminary investigation of food guarding  
842 behavior in shelter dogs in the United States. *Animals*. 2012;2: 331–346.  
843 doi:10.3390/ani2030331
- 844 39. Mornement KM, Coleman GJ, Toukhsati SR, Bennett PC. Evaluation of the predictive  
845 validity of the Behavioural Assessment for Re-homing K9's (B.A.R.K.) protocol and owner  
846 satisfaction with adopted dogs. *Appl Anim Behav Sci*. 2015;167: 35–42.  
847 doi:10.1016/j.applanim.2015.03.013
- 848 40. Riemer S, Müller C, Virányi Z, Huber L, Range F. The predictive value of early  
849 behavioural assessments in pet dogs: a longitudinal study from neonates to adults. *PLOS*  
850 *ONE*. 2014;9: e101237. doi:10.1371/journal.pone.0101237
- 851 41. Wilsson E, Sundgren P-E. Behaviour test for eight-week old puppies: heritabilities of  
852 tested behaviour traits and its correspondence to later behaviour. *Appl Anim Behav Sci*.  
853 1998;58: 151–162. doi:10.1016/S0168-1591(97)00093-2
- 854 42. Goodloe LP, Borchelt PL. Companion dog temperament traits. *J Appl Anim Welf Sci*.  
855 1998;1: 303–338. doi:10.1207/s15327604jaws0104\_1
- 856 43. Jones AC. Development and validation of a dog personality questionnaire. Doctoral  
857 Thesis. University of Texas at Austin. 2008. Available from:  
858 [http://gosling.psy.utexas.edu/wp-content/uploads/2014/10/Amanda-Claire-Jones-Diss-](http://gosling.psy.utexas.edu/wp-content/uploads/2014/10/Amanda-Claire-Jones-Diss-2008.pdf)  
859 [2008.pdf](http://gosling.psy.utexas.edu/wp-content/uploads/2014/10/Amanda-Claire-Jones-Diss-2008.pdf)

- 860 44. Orritt R. Dog bites: a complex public health issue. *Vet Rec.* 2015;176: 640–641.  
861 doi:10.1136/vr.h3215
- 862 45. Svartberg K. Shyness-boldness predicts performance in working dogs. *Appl Anim*  
863 *Behav Sci.* 2002;79: 157–174. doi:10.1016/S0168-1591(02)00120-X
- 864 46. Taylor KD, Mills DS. The development and assessment of temperament tests for  
865 adult companion dogs. *J Vet Behav.* 2006;1: 94–108. doi:10.1016/j.jveb.2006.09.002
- 866 47. Henning G. Meanings and implications of the principle of local independence. *Lang*  
867 *Res.* 1989;6: 95–108. doi:10.1177/026553228900600108
- 868 48. Patronek GJ, Bradley J. No better than flipping a coin: reconsidering canine behavior  
869 evaluations in animal shelters. *J Vet Behav.* 2016;15: 66–77.  
870 doi:10.1016/j.jveb.2016.08.001
- 871 49. Casey RA, Loftus B, Bolster C, Richards GJ, Blackwell EJ. Human directed aggression  
872 in domestic dogs (*Canis familiaris*): occurrence in different contexts and risk factors.  
873 *Appl Anim Behav Sci.* 2014;152: 52–63. doi:10.1016/j.applanim.2013.12.003
- 874 50. Hsu Y, Sun L. Factors associated with aggressive responses in pet dogs. *Appl Anim*  
875 *Behav Sci.* 2010;123: 108–123. doi:10.1016/j.applanim.2010.01.013
- 876 51. Sherman CK, Reisner IR, Taliaferro LA, Houpt KA. Characteristics, treatment, and  
877 outcome of 99 cases of aggression between dogs. *Appl Anim Behav Sci.* 1996;47: 91–  
878 108. doi:10.1016/0168-1591(95)01013-0

- 879 52. Voith VL, Trevejo R, Dowling-Guyer S, Chadik C, Marder A, Johnson V, et al.  
880 Comparison of visual and DNA breed identification of dogs and inter-observer reliability.  
881 *Sociology*. 2013;3: 17–29.
- 882 53. Owczarczak-Garstecka, SC, Burman OHP. Can sleep and resting behaviour be used as  
883 indicators of welfare in shelter dogs (*Canis lupus familiaris*)? *PLOS ONE*. 2016;11:  
884 e0163620. doi:10.1371/journal.pone.0163620
- 885
- 886 54. R Development Core Team. R: a language and environment for statistical computing.  
887 Vienna, Austria: R Foundation for Statistical Computing; 2016. [https://www.r-](https://www.r-project.org/)  
888 [project.org/](https://www.r-project.org/)
- 889 55. Honaker J, King G, Blackwell M. Amelia: A program for missing data. 2015. Version  
890 1.7.4. <https://cran.r-project.org/web/packages/Amelia/vignettes/amelia.pdf>
- 891 56. Asp HE, Fikse WF, Nilsson K, Strandberg E. Breed differences in everyday behaviour  
892 of dogs. *Appl Anim Behav Sci*. 2015;169: 69–77. doi:10.1016/j.applanim.2015.04.010
- 893 57. Rosseel, Y., Oberski, D., Byrnes, J., Vanbrabant, L., Savalei, V., Merkle, E., et al,  
894 *Lavaan: Latent Variable Analysis*. 2016. Version 0.5-22. [https://cran.r-](https://cran.r-project.org/web/packages/lavaan/)  
895 [project.org/web/packages/lavaan/](https://cran.r-project.org/web/packages/lavaan/)
- 896 58. Muthén B, Christoffersson A. Simultaneous factor analysis of dichotomous variables  
897 in several groups. *Psychometrika*. 1981;46: 407–419. doi:10.1007/BF02293798

- 898 59. Muthén B. A general structural equation model with dichotomous, ordered  
899 categorical, and continuous latent variable indicators. *Psychometrika*. 1984;49: 115–  
900 132. doi:10.1007/BF02294210
- 901 60. Jorgensen TD, Pornprasertmanit S, Miller P, Schoemann A, Rosseel Y, Quick C, et al.  
902 *semTools: useful tools for structural equation modeling*. 2016.  
903 <https://rdrr.io/cran/semTools/>
- 904 61. Hermida R. The problem of allowing correlated errors in structural equation  
905 modeling: concerns and considerations. *Comp Method Soc Sci*. 2015;3: 05–17.
- 906 62. Millsap RE, Yun-Tein J. Assessing factorial invariance in ordered-categorical  
907 measures. *Multivariate Behav Res*. 2004;39: 479–515.  
908 doi:10.1207/S15327906MBR3903\_4
- 909 63. Kamata A. Item analysis by the hierarchical generalized linear model. *J Educ Meas*.  
910 2001;38: 79–93. doi:10.1111/j.1745-3984.2001.tb01117.x
- 911 64. Van den Noortgate W, De Boeck P. Assessing and explaining differential item  
912 functioning using logistic mixed models. *J Educ Behav Stat*. 2005;30: 443–464.
- 913 65. Nakagawa S, Schielzeth H. Repeatability for Gaussian and non-Gaussian data: a  
914 practical guide for biologists. *Biol Rev Camb Philos Sci*. 2010;85: 935–956.  
915 doi:10.1111/j.1469-185X.2010.00141.x

- 916 66. Stan Development Team. Stan modeling language users guide and reference  
917 manual. 2016. Version 2.14.0. [https://github.com/stan-](https://github.com/stan-dev/stan/releases/download/v2.14.0/stan-reference-2.14.0.pdf)  
918 [dev/stan/releases/download/v2.14.0/stan-reference-2.14.0.pdf](https://github.com/stan-dev/stan/releases/download/v2.14.0/stan-reference-2.14.0.pdf)
- 919 67. Kruschke JK. Bayesian data analysis. Wiley Interdiscip Rev: Cogn Sci. 2010;1: 658–  
920 676. doi:[10.1002/wcs.72](https://doi.org/10.1002/wcs.72)
- 921 68. Vehtari A, Gelman A, Gabry J, Piironen J, Goodrich B. Loo: Efficient leave-one-out  
922 cross-validation and WAIC for Bayesian models. 2016. Version 1.0.0. [https://cran.r-](https://cran.r-project.org/web/packages/loo/loo.pdf)  
923 [project.org/web/packages/loo/loo.pdf](https://cran.r-project.org/web/packages/loo/loo.pdf)
- 924 69. Kruschke J. Doing Bayesian data analysis: A tutorial with R, JAGS, and Stan. 2nd ed.  
925 Academic Press; 2014.
- 926 70. Chen JJ, Tsong Y, Kang S-H. Tests for equivalence or noninferiority between two  
927 proportions. Drug Inf J. 2000;34: 569–578. doi:[10.1177/009286150003400225](https://doi.org/10.1177/009286150003400225)
- 928 71. Barnard S, Marshall-Pescini S, Passalacqua C, Beghelli V, Capra A, Normando S, et al.  
929 Does subjective rating reflect behavioural coding? Personality in 2 month-old dog  
930 puppies: an open-field test and adjective-based questionnaire. PLOS ONE. 2016;11:  
931 e0149831. doi:[10.1371/journal.pone.0149831](https://doi.org/10.1371/journal.pone.0149831)
- 932 72. Ion A, Iliescu D. The measurement equivalence of personality measures across high-  
933 and low-stake test taking settings. Pers Individ Dif. 2017;110: 1–6.  
934 doi:[10.1016/j.paid.2017.01.008](https://doi.org/10.1016/j.paid.2017.01.008)

- 935 73. Bowden SC, Saklofske DH, van de Vijver FJR, Sudarshan NJ, Eysenck SBG. Cross-  
936 cultural measurement invariance of the Eysenck Personality Questionnaire across 33  
937 countries. *Pers Individ Dif*. 2016;103: 53–60. doi:10.1016/j.paid.2016.04.028
- 938 74. van den Berg SM, Moor MHM de, McGue M, Pettersson E, Terracciano A, Verweij  
939 KJH, et al. Harmonization of Neuroticism and Extraversion phenotypes across  
940 inventories and cohorts in the Genetics of Personality Consortium: an application of  
941 item response theory. *Behav Genet*. 2014;44: 295–313. doi:10.1007/s10519-014-9654-x
- 942 75. Budaev S, Brown C. Personality traits and behaviour. In: Brown C, Laland K, Krause J,  
943 editors. *Fish cognition and behavior*. Wiley-Blackwell; 2011. pp. 135–165.
- 944 76. Campbell DT, Fiske DW. Convergent and discriminant validation by the multitrait-  
945 multimethod matrix. *Psychol Bull*. 1959;56: 81–105. doi:10.1037/h0046016
- 946 77. Carter AJ, Feeney WE, Marshall HH, Cowlishaw G, Heinsohn R. Animal personality:  
947 what are behavioural ecologists measuring? *Biol Rev Camb Philos Soc*. 2013;88: 465–  
948 475. doi:10.1111/brv.12007
- 949 78. Podsakoff PM, MacKenzie SB, Lee J-Y, Podsakoff NP. Common method biases in  
950 behavioral research: a critical review of the literature and recommended remedies. *J*  
951 *Appl Psychol*. 2003;88: 879–903. doi:10.1037/0021-9010.88.5.879
- 952 79. Cole DA, Ciesla JA, Steiger JH. The insidious effects of failing to include design-driven  
953 correlated residuals in latent-variable covariance structure analysis. *Psychol Methods*.  
954 2007;12: 381–398. doi:10.1037/1082-989X.12.4.381

- 955 80. Yen WM. Scaling performance assessments: strategies for managing local item  
956 dependence. *J Educ Meas.* 1993;30: 187–213. doi:10.1111/j.1745-3984.1993.tb00423.x
- 957 81. Carter AJ, Marshall HH, Heinsohn R, Cowlshaw G. How not to measure boldness:  
958 novel object and antipredator responses are not the same in wild baboons. *Anim Behav.*  
959 2012;84: 603–609. doi:10.1016/j.anbehav.2012.06.015
- 960 82. Cramer AOJ, van der Sluis S, Noordhof A, Wichers M, Geschwind N, Aggen SH, et al.  
961 Dimensions of normal personality as networks in search of equilibrium: you can't like  
962 parties if you don't like people. *Eur J Pers.* 2012;26: 414–431. doi:10.1002/per.1866
- 963 83. Schmittmann VD, Cramer AOJ, Waldorp LJ, Epskamp S, Kievit RA, Borsboom D.  
964 Deconstructing the construct: a network perspective on psychological phenomena. *New*  
965 *Ideas Psychol.* 2013;31: 43–53. doi:10.1016/j.newideapsych.2011.02.007
- 966 84. Hamaker EL, Nesselroade JR, Molenaar PCM. The integrated trait-state model. *J Res*  
967 *Pers.* 2007;41: 295–315. doi:10.1016/j.jrp.2006.04.003
- 968 85. Fadel FR, Driscoll P, Pilot M, Wright H, Zulch H, Mills D. Differences in trait  
969 impulsivity indicate diversification of dog breeds into working and show lines. *Sci Rep.*  
970 2016;6. doi:10.1038/srep22162
- 971 86. Schimmack U. What multi-method data tell us about construct validity. *Eur J Pers.*  
972 2010;24: 241–257. doi:10.1002/per.771



- 973 87. Duckworth RA. Neuroendocrine mechanisms underlying behavioral stability:  
974 implications for the evolutionary origin of personality. *Ann N Y Acad Sci.* 2015;1360: 54–  
975 74. doi:10.1111/nyas.12797
- 976 88. Koski SE. How to measure animal personality and why does It matter? Integrating  
977 the psychological and biological approaches to animal personality. In: Inoue-Murayama  
978 M, Kawamura S, Weiss A, editors. *From Genes to Animal Behavior.* Springer Japan; 2011.  
979 pp. 115–136. doi:10.1007/978-4-431-53892-9\_5
- 980 89. D. *Measuring the mind: Conceptual issues in contemporary psychometrics.*  
981 Cambridge University Press; 2005.
- 982 90. Maul A, Torres Iribarra D, Wilson M. On the philosophical foundations of  
983 psychological measurement. *Measurement.* 2016;79: 311–320.  
984 doi:10.1016/j.measurement.2015.11.001
- 985 91. Molenaar PCM. A manifesto on psychology as idiographic science: bringing the  
986 person back into scientific psychology, this time forever. *Measurement.* 2004;2: 201–  
987 218. doi:10.1207/s15366359mea0204\_1
- 988 92. Adolf J, Schuurman NK, Borkenau P, Borsboom D, Dolan CV. Measurement  
989 invariance within and between individuals: a distinct problem in testing the equivalence  
990 of intra- and inter-individual model structures. *Front Psychol.* 2014;5.  
991 doi:10.3389/fpsyg.2014.00883

- 992 93. Stamps JA, Briffa M, Biro PA. Unpredictable animals: individual differences in  
993 intraindividual variability (IIV). *Anim Behav.* 2012;83: 1325–1334.  
994 doi:10.1016/j.anbehav.2012.02.017
- 995 94. Biro PA, Stamps JA. Using repeatability to study physiological and behavioural traits:  
996 ignore time-related change at your peril. *Anim Behav.* 2015;105: 223–230.  
997 doi:10.1016/j.anbehav.2015.04.008
- 998
- 999

## 1000 **Supporting Information**

1001 **Table S1. Counts of aggression per context.** The number of dogs who had 0, 1, and > 1  
1002 counts of aggression.

1003

1004 **Table S2. Tetrachoric correlations between aggression contexts.** Tetrachoric  
1005 correlations between aggression contexts on the raw binary data, before the multiple  
1006 imputation. Abbreviations used: HND (*Handling*); FPL (*Interactions with familiar people*);  
1007 UPL (*Interactions with unfamiliar people*); KD (*In kennel towards dogs*); KP (*In kennel*  
1008 *towards people*); OKD (*Out of kennel towards dogs*); OKP (*Out of kennel towards*  
1009 *people*); EAT (*Eating food*); TOY (*Interactions with toys*); DM (*Interactions with male*  
1010 *dogs*); DF (*Interactions with female dogs*).

1011

1012 **Table S3. Bayesian hierarchical model parameter estimates for aggression towards**  
1013 **people in different contexts.** Mean and 95% credibility interval (CI) estimates for all  
1014 parameters from the Bayesian hierarchical logistic model assessing measurement  
1015 invariance for contexts reflecting aggressiveness towards people. Differences between  
1016 levels of categorical variables are indicated by ‘.v.’ in the parameter name; interactions  
1017 are denoted with ‘\*’ in the parameter name. The decision rule for each parameter is  
1018 given except for those variables not interpreted inferentially: YES = 95% CI falls

1019 completely outside the region of practical equivalence (ROPE); NULL = 95% CI falls

1020 completely inside the ROPE; ROPE = 95% CI partly covers the ROPE.

1021

1022 **Table S4. Bayesian hierarchical model parameter estimates for aggression towards**

1023 **dogs in different contexts.** Mean and 95% credibility interval (CI) estimates for all

1024 parameters from the Bayesian hierarchical logistic model assessing measurement

1025 invariance for contexts reflecting aggressiveness towards dogs. Differences between

1026 levels of categorical variables are indicated by '.v.' in the parameter name; interactions

1027 are denoted with '\*' in the parameter name. The decision rule for each parameter is

1028 given except for those variables not interpreted inferentially: YES = 95% CI falls

1029 completely outside the region of practical equivalence (ROPE); NULL = 95% CI falls

1030 completely inside the ROPE; ROPE = 95% CI partly covers the ROPE.

1031
